# Supplementary material for: A zlog-based algorithm and tool for plausibility checks of reference intervals
Source: publisher site journal article supplement (doi:10.1515/cclm-2022-0688), 2022-11-02
Supplement: Supplementary file 1 [file j_cclm-2022-0688_suppl.docx]

**Supplemental Table 1**: Results of the calculation of zlog values from the CALIPER study. Only absolute values above 5 are listed, indicating strong jumps of the reference intervals between two age groups. (LL = Lower Reference Limit, UL = Upper Reference Limit)

| **Analyte** | **Sex** | **Age** | **Reference Limit** | **zlog** | **Reference for the calculation of the zlog value** | |
| --- | --- | --- | --- | --- | --- | --- |
| **Age** | **Reference Limit** |
| **Alanine Aminotransferase** (U/L) | MF | 1 - < 13 years | 11 - 30 | 5.04 | 0 - < 1 year | 5 (LL) |
| **Albumin G (Bromocresol Green)** (g/L) | MF | 1 - < 8 years | 38 - 47 | 7.59 | 15 days - < 1 year | 28 (LL) |
| **Albumin P (Bromocresol Purple)** (g/L) | MF | 1 - < 8 years | 35 - 45 | 7.21 | 15 days - < 1 year | 25 (LL) |
| **Alkaline Phosphatase** (U/L) | F | 15 - < 17 years | 54 - 128 | 5.52 | 13 - < 15 years | 280 (UL) |
| M | 17 - < 19 years | 59 - 164 | 5.03 | 15 - < 17 years | 365 (UL) |
| **Amylase** (U/L) | MF | 1 - < 19 years | 25 - 101 | 7.91 | 13 weeks - < 1 year | 3 (LL) |
| **Apolipoprotein AI** (g/L) | F | 0 - 14 days | 0.71 - 0.97 | 5.63 | 15 days - < 1 year | 0.53 (LL) |
| F | 0 - 14 days | 0.71 - 0.97 | 9.37 | 15 days - < 1 year | 1.75 (UL) |
| M | 0 - 14 days | 0.62 - 0.91 | 8.64 | 15 days - < 1 year | 1.75 (UL) |
| **Apolipoprotein B** (g/L) | MF | 1 - < 6 years | 0.41 - 0.93 | 5.64 | 15 days - < 1 year | 0.19 (UL) |
| **Carbon Dioxide** (mmol/L) | MF | 15 days - < 1 year | 10 - 24 | 5.06 | 0 - 14 days | 5 (UL) |
| **Cholesterol** (mmol/L) | MF | 1 - < 19 years | 2.9 - 5.4 | 5.48 | 15 days - < 1 year | 1.66 (LL) |
| M | 0 - 14 days | 1.1 - 2.82 | 5.19 | 15 days - < 1 year | 6.13 (UL) |
| **Cholinesterase** (U/L) | F | 17 - < 19 years | 7511 - 10904 | 5.46 | 1 - < 11 years | 15206 (UL) |
| **Complement C3** (g/L) | MF | 1 - < 19 years | 0.83 - 1.52 | 5.12 | 15 days - < 1 year | 0.51 (LL) |
| **C-reactive protein** (mg/L) | MF | 15 days - < 15 years | 0.1 - 1 | 5.04 | 0 - 14 days | 6.1 (UL) |
| **Creatinine (Enzymatic)** (µmol/L) | MF | 0 - 14 days | 29 - 82 | 6.37 | 15 days - < 2 years | 9 (LL) |
| MF | 2 - < 5 years | 18 - 38 | 5.60 | 15 days - < 2 years | 9 (LL) |
| **Creatinine (Jaffe)** (µmol/L) | MF | 15 days - < 1 year | 28 - 47 | 7.13 | 0 - 14 days | 93 (UL) |
| **Direct Bilirubin** (µmol/L) | MF | 0 - 14 days | 5.7 - 12.1 | 12.19 | 15 days - < 1 year | 0.8 (LL) |
| **Direct HDL-Cholesterol** (mmol/L) | MF | 1 - < 4 years | 0.84 - 1.63 | 8.05 | 15 days - < 1 year | 0.30 (LL) |
| **Gamma-Glutamyl Transferase** (U/L) | MF | 1 - < 11 years | 6 - 16 | 10.24 | 15 days - < 1 year | 127 (UL) |
| **Immunoglobulin G** (g/L) | MF | 1 - < 4 years | 3.2 - 11.5 | 5.23 | 15 days - < 1 year | 1.1 (LL) |
| **Lactate Dehydrogenase** (U/L) | MF | 15 days - < 1 year | 163 - 452 | 5.78 | 0 - 14 days | 1222 (UL) |
| **Prealbumin** (g/L) | MF | 1 - < 5 years | 0.12 - 0.23 | 7.24 | 0 - 14 days | 0.02 (LL) |
| **Total Bilirubin** (µmol/L) | MF | 15 days - < 1 year | 0.8 - 11.7 | 6.62 | 0 - 14 days | 283.8 (UL) |
| **Total Protein** (g/L) | MF | 1 - < 6 years | 61 - 75 | 8.16 | 15 days - < 1 year | 44 (LL) |
| **Transferrin** (g/L) | MF | 1 - < 19 years | 2.2 - 3.37 | 8.59 | 9 weeks - < 1 year | 1.07 (LL) |
| **Urea** (mmol/L) | MF | 1 - < 10 years | 3.2 - 7.9 | 6.21 | 15 days - < 1 year | 1.2 (LL) |
